# Supplementary material for: Patterns of within-host genetic diversity in SARS-CoV-2
Source: eLife. 2021 Aug 13;10:e66857. doi: 10.7554/eLife.66857 (PMC8363274; doi:10.7554/eLife.66857)
Supplement: Supplementary file 4. [file elife-66857-supp4.csv]

position	number of samples	mean VAF	frequency of non-reference mutation in COG-UK
11075	705	59.7964376590331	0.254622612913004
11083	507	43.0025445292621	12.8160048499545
11074	496	42.069550466497	0.715368293422249
522	129	10.941475826972	0.418308578357078
26780	126	10.6870229007634	0.0303122158229767
1547	101	8.5665818490246	0.466808123673841
14408	71	6.02205258693808	79.2240072749318
28253	71	6.02205258693808	0.678993634434677
13914	55	4.66497031382528	0.018187329493786
26137	51	4.32569974554707	0.303122158229767
635	49	4.15606446140797	0.430433464686269
241	40	3.39270568278202	79.3210063655653
26785	40	3.39270568278202	0.0484995453167627
683	35	2.96861747243427	0.290997271900576
23403	29	2.45971162001696	79.2179448317672
28881	27	2.29007633587786	46.0563807214307
13778	26	2.20525869380831	0.00606244316459533
25521	25	2.12044105173876	0.400121248863292
14805	23	1.95080576759966	11.8278266141255
9491	22	1.86598812553011	0.309184601394362
11071	21	1.78117048346056	0.127311306456502
13780	21	1.78117048346056	0.0121248863291907
21575	21	1.78117048346056	1.38829948469233
29242	21	1.78117048346056	0.0848742043043346
9430	20	1.69635284139101	0.424371021521673
203	19	1.61153519932146	0.36374658987572
3037	18	1.52671755725191	79.1148832979691
686	17	1.44189991518236	0.472870566838436
3096	17	1.44189991518236	0.248560169748409
16375	17	1.44189991518236	0.0788117611397393
16466	17	1.44189991518236	0.127311306456502
17167	17	1.44189991518236	0
23559	17	1.44189991518236	0.0666868748105487
9438	16	1.35708227311281	0.9093664746893
21137	16	1.35708227311281	0.303122158229767
29051	16	1.35708227311281	0.0424371021521673
23555	15	1.27226463104326	0.054561988481358
26333	15	1.27226463104326	0.115186420127311
9474	14	1.18744698897371	0.551682327978175
13571	14	1.18744698897371	3.83146408002425
16887	14	1.18744698897371	0.521370112155199
26787	14	1.18744698897371	0.072749317975144
28603	14	1.18744698897371	0.103061533798121
24213	13	1.10262934690416	0.0969990906335253
11651	12	1.01781170483461	0.018187329493786
27925	12	1.01781170483461	0.563807214307366
514	11	0.932994062765055	0.703243407093058
26781	11	0.932994062765055	0.103061533798121
558	10	0.848176420695505	0.133373749621097
1912	10	0.848176420695505	0.339496817217339
9479	10	0.848176420695505	0.394058805698697
11073	10	0.848176420695505	0.0666868748105487
12578	10	0.848176420695505	0.036374658987572
26144	10	0.848176420695505	11.0033343437405
26681	10	0.848176420695505	0.575932100636557
29241	10	0.848176420695505	0.0484995453167627
9165	9	0.763358778625954	0.157623522279479
9737	9	0.763358778625954	0.145498635950288
10369	9	0.763358778625954	2.52803879963625
14790	9	0.763358778625954	0.0424371021521673
22899	9	0.763358778625954	3.26765686571688
24933	9	0.763358778625954	0.127311306456502
27264	9	0.763358778625954	0.127311306456502
27384	9	0.763358778625954	0.218247953925432
27920	9	0.763358778625954	0.612306759624129
28086	9	0.763358778625954	0.788117611397393
28887	9	0.763358778625954	0.297059715065171
29781	9	0.763358778625954	4.90451652015762
186	8	0.678541136556404	0.321309487723553
2558	8	0.678541136556404	5.69869657471961
3564	8	0.678541136556404	2.31585328887542
6539	8	0.678541136556404	0.163685965444074
7735	8	0.678541136556404	1.28523795089421
8313	8	0.678541136556404	0.00606244316459533
8315	8	0.678541136556404	0.00606244316459533
9180	8	0.678541136556404	0.0969990906335253
9603	8	0.678541136556404	0.18187329493786
12164	8	0.678541136556404	0.00606244316459533
13458	8	0.678541136556404	3.55259169445286
15842	8	0.678541136556404	0
22452	8	0.678541136556404	6.43225219763565
23435	8	0.678541136556404	0
28079	8	0.678541136556404	0.588056986965747
28826	8	0.678541136556404	0.0606244316459533
28854	8	0.678541136556404	2.84934828735981
29543	8	0.678541136556404	0.230372840254623
29730	8	0.678541136556404	2.10366777811458
29754	8	0.678541136556404	2.4734768111549
462	7	0.593723494486853	0.157623522279479
815	7	0.593723494486853	0.072749317975144
1440	7	0.593723494486853	3.98302515913913
2480	7	0.593723494486853	5.52894816611094
4331	7	0.593723494486853	0.054561988481358
6701	7	0.593723494486853	0.145498635950288
7528	7	0.593723494486853	0.151561079114883
9924	7	0.593723494486853	0.0606244316459533
10323	7	0.593723494486853	2.55835101545923
11595	7	0.593723494486853	0.054561988481358
11824	7	0.593723494486853	0.151561079114883
13469	7	0.593723494486853	3.52227947862989
14184	7	0.593723494486853	0.387996362534101
14411	7	0.593723494486853	0.09093664746893
16247	7	0.593723494486853	0.527432555319794
16438	7	0.593723494486853	0.018187329493786
17410	7	0.593723494486853	0.0969990906335253
17440	7	0.593723494486853	0.163685965444074
20759	7	0.593723494486853	0.163685965444074
21569	7	0.593723494486853	0.6486814186117
22858	7	0.593723494486853	0.0788117611397393
23525	7	0.593723494486853	0.121248863291907
26768	7	0.593723494486853	0.0121248863291907
26801	7	0.593723494486853	0.151561079114883
29743	7	0.593723494486853	2.32191573204001
29779	7	0.593723494486853	4.77114277053653
508	6	0.508905852417303	0.278872385571385
3211	6	0.508905852417303	0.00606244316459533
4554	6	0.508905852417303	2.18854198241891
6813	6	0.508905852417303	0.115186420127311
9634	6	0.508905852417303	0.303122158229767
9848	6	0.508905852417303	0.103061533798121
10029	6	0.508905852417303	0.0242497726583813
11152	6	0.508905852417303	0.0666868748105487
12459	6	0.508905852417303	0.127311306456502
15017	6	0.508905852417303	0.072749317975144
16474	6	0.508905852417303	0.0424371021521673
16949	6	0.508905852417303	0.036374658987572
17013	6	0.508905852417303	0.0121248863291907
17074	6	0.508905852417303	0.0424371021521673
17247	6	0.508905852417303	3.79508942103668
18555	6	0.508905852417303	0.109123976962716
20627	6	0.508905852417303	0.133373749621097
21614	6	0.508905852417303	1.21248863291907
21991	6	0.508905852417303	0.290997271900576
25096	6	0.508905852417303	0.303122158229767
25169	6	0.508905852417303	0.230372840254623
26158	6	0.508905852417303	0.321309487723553
26211	6	0.508905852417303	0.339496817217339
26533	6	0.508905852417303	0.0788117611397393
26776	6	0.508905852417303	0.018187329493786
26873	6	0.508905852417303	0.169748408608669
28001	6	0.508905852417303	0.515307668990603
28087	6	0.508905852417303	0.515307668990603
28311	6	0.508905852417303	0.27280994240679
28770	6	0.508905852417303	0.054561988481358
28795	6	0.508905852417303	0.018187329493786
29274	6	0.508905852417303	0.054561988481358
29520	6	0.508905852417303	0.0848742043043346
29635	6	0.508905852417303	0.072749317975144
29700	6	0.508905852417303	1.69748408608669
29736	6	0.508905852417303	2.18247953925432
29774	6	0.508905852417303	4.88026674749924
313	5	0.424088210347752	1.73385874507427
346	5	0.424088210347752	0.072749317975144
1108	5	0.424088210347752	0.072749317975144
1594	5	0.424088210347752	0.260685056077599
1684	5	0.424088210347752	0.412246135192483
3259	5	0.424088210347752	0.018187329493786
3877	5	0.424088210347752	0.315247044558957
4815	5	0.424088210347752	0.0484995453167627
6762	5	0.424088210347752	0.0666868748105487
7765	5	0.424088210347752	1.27917550772961
9519	5	0.424088210347752	0.0666868748105487
9866	5	0.424088210347752	0.036374658987572
10252	5	0.424088210347752	2.43103970900273
10626	5	0.424088210347752	0.266747499242195
10755	5	0.424088210347752	0.206123067596241
12473	5	0.424088210347752	0.0424371021521673
15738	5	0.424088210347752	0.036374658987572
16111	5	0.424088210347752	0.0484995453167627
16289	5	0.424088210347752	2.56441345862383
16393	5	0.424088210347752	0.103061533798121
16838	5	0.424088210347752	0.018187329493786
17010	5	0.424088210347752	0.145498635950288
17012	5	0.424088210347752	0.0424371021521673
17550	5	0.424088210347752	0.09093664746893
17676	5	0.424088210347752	0.109123976962716
17795	5	0.424088210347752	0.121248863291907
18877	5	0.424088210347752	0.672931191270082
20762	5	0.424088210347752	0.187935738102455
20922	5	0.424088210347752	0
24138	5	0.424088210347752	0.0424371021521673
25000	5	0.424088210347752	0.145498635950288
25613	5	0.424088210347752	0.0606244316459533
25889	5	0.424088210347752	0.751742952409821
26270	5	0.424088210347752	0.0969990906335253
26858	5	0.424088210347752	0.0666868748105487
26895	5	0.424088210347752	0.703243407093058
27297	5	0.424088210347752	0.109123976962716
27393	5	0.424088210347752	0.0666868748105487
27434	5	0.424088210347752	0.151561079114883
27476	5	0.424088210347752	0.109123976962716
27880	5	0.424088210347752	0.624431645953319
28077	5	0.424088210347752	1.27311306456502
28744	5	0.424088210347752	0.0848742043043346
29281	5	0.424088210347752	0.187935738102455
29311	5	0.424088210347752	0.0969990906335253
29555	5	0.424088210347752	0.115186420127311
29614	5	0.424088210347752	0.266747499242195
29642	5	0.424088210347752	0.115186420127311
29686	5	0.424088210347752	1.23067596241285
